# Supplementary material
Source: publisher figshare collection journal article supplement (https://acs.figshare.com/ndownloader/files/32120603)
Supplement: Supplementary file 1 [file 32120603]

# Supporting Information

## Effect of Polymer Topology on Microstructure, Segmental Dynamics, and Ionic Conductivity in PEO/PMMA Based Solid Polymer Electrolytes

Recep Bakar,<sup>1</sup> Saeid Darvishi,<sup>2</sup> Tianyu Li,<sup>3</sup> Mertcan Han,<sup>4</sup> Umut Aydemir,<sup>5,6</sup> Sedat Nizamoglu,<sup>4,7</sup>  
Kunlun Hong,<sup>8</sup> Erkan Senses<sup>2\*</sup>

<sup>1</sup>*Department of Material Science and Engineering, Koç University, Sariyer, Istanbul 34450, Turkey*

<sup>2</sup>*Department of Chemical and Biological Engineering, Koç University, Sariyer, Istanbul 34450, Turkey*

<sup>3</sup>*Department of Materials Science and Engineering, The University of Tennessee Knoxville, TN 37996, United States*

<sup>4</sup>*Department of Electrical and Electronics Engineering, Koç University, Sariyer, Istanbul 34450, Turkey*

<sup>5</sup>*Department of Chemistry, Koç University, Sariyer, Istanbul 34450, Turkey*

<sup>6</sup>*Koç University Boron and Advanced Materials Application and Research Center, Sariyer, Istanbul 34450, Turkey*

<sup>7</sup>*Department of Biomedical Science and Engineering, Koç University, Istanbul 34450, Turkey*

<sup>8</sup>*Center for Nanophase Materials Sciences, Oak Ridge National Laboratory, Oak Ridge, TN 37831, United States*

\*Corresponding author: esenses@ku.edu.tr

### X-ray diffraction Analysis (XRD):

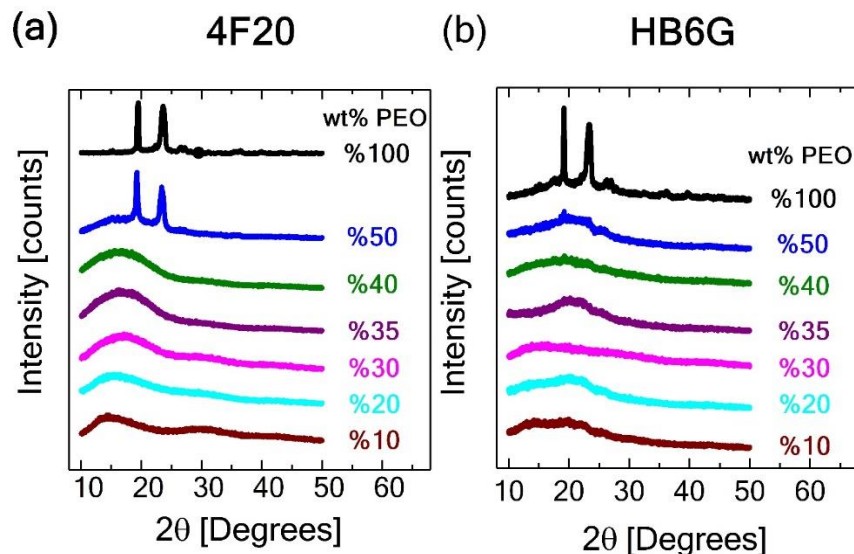

**Figure S1.** XRD results for PEO/PMMA blends in different PEO wt% concentrations and with various PEO topologies (a) 4-arms, (b) HB6G.

### Calculation of the crystallization (%) in the PEO/PMMA blends

To estimate the degree of neat PEO crystallinity for different polymer structures along with the effect of number of arms and arm molecular weight on the crystallization, we used the following equation  $X_c = \left( \frac{\Delta H_m}{\Delta H_c * f_{PEO}} \right) * 100$ , where  $f_{PEO}$  is the weight fraction of PEO in the polymer blend,  $\Delta H_m$  is the melting enthalpy of the sample, and  $\Delta H_c$  is the melting enthalpy of completely crystalline PEO, which is 196.4 J/g.<sup>1</sup>

**Table S1.** Melting enthalpies and degree of crystallizations of various PEO architectures over different weight fraction of PEO in blends with PMMA.

| Sample | wt% of PEO | Melting enthalpy   | Crystallinity |
|--------|------------|--------------------|---------------|
|        |            | $\Delta H_m$ , J/g | $X_c$ , %     |
| L20    | 100.00     | 143.74             | 73.19         |
|        | 75.00      | 88.00              | 44.91         |
|        | 50.00      | 55.48              | 28.25         |
|        | 40.00      | 17.67              | 9.00          |
|        | 35.00      | 4.45               | 2.26          |
| 4F20   | 100.00     | 125.00             | 63.65         |
|        | 75.00      | 46.26              | 23.55         |
|        | 50.00      | 10.90              | 5.55          |
| 8F20   | 100.00     | 120.00             | 61.10         |
|        | 75.00      | 76.00              | 38.10         |
|        | 50.00      | 40.00              | 20.24         |
|        | 40.00      | 0.96               | 0.49          |
| HB6G   | 100.00     | 61.13              | 31.12         |
|        | 75.00      | 37.04              | 18.86         |
|        | 50.00      | 14.73              | 7.50          |
|        | 40.00      | 7.11               | 3.62          |
|        | 35.00      | 2.02               | 1.03          |

## Modulated differential scanning calorimetry (MDSC)

**Table S2.** Glass transition temperatures with entire peak widths at half-maximum height ( $\Delta T_g$ ) for neat PEO with various architectures in the blends with PMMA.

| Sample | Neat PEO               |                  |
|--------|------------------------|------------------|
|        | T <sub>g,eff</sub> , K | $\Delta T_g$ , K |
| L20    | 221.76                 | 10.62            |
| 4F20   | 220.49                 | 9.49             |
| 8F20   | 222.69                 | 10.56            |
| HB6G   | 232.84                 | 13.41            |
| BB     | 215.68                 | 9.99             |

## Lodge-McLeish Self-concentration Model

T<sub>g</sub> for each component in the blend could be also estimated via the effective volume fraction of each component,  $\phi_{eff}$ , determined by the Eq. 1,<sup>2</sup>

$$\phi_{eff} = \phi_s + (1 + \phi_s)\phi \quad (S1)$$

where  $\phi_s$  is the self-concentration (volume fraction) of the polymer due to chain connectivity effects and  $\phi$  is the bulk blend composition. Self-concentration,  $\phi_s$ , is also based on the appropriate volume surrounding the polymer segment under consideration. Even though it is usually to be on the order of the Kuhn length cubed ( $l_k^3$ ), it can be changed by a multiplicative constant of order unity, as the choice of  $V = l_k^3$  is arbitrary.<sup>3</sup> Then the self-concentration,  $\phi_s$ , is estimated using the Eq. 2,<sup>2</sup>

$$\phi_s = \frac{c_\infty M_0}{k\rho N_{av}V} \quad (S2)$$

where  $C_\infty$  is the characteristic ratio,  $M_0$  is the repeat unit molar mass,  $N_{av}$  is the Avogadro number,  $\rho$  is the density of the polymer and  $k$  is the number of backbone bonds per repeat unit. The model associates the average local concentration of each component with a local glass temperature given by the Eq. 3,<sup>2</sup>

$$T_{g,eff} = T_g(\phi)|_{\phi=\phi_{eff}} \quad (S3)$$

In other words, the effective glass temperature,  $T_{g,eff}$ , is calculated from the macroscopic  $T_g(\phi)$ , however, evaluated at  $\phi_{eff}$ . For the macroscopic composition dependence of the glass transition temperature, the well-known Fox equation was used but with the effective concentration,  $\phi_{eff}$ , for each component.

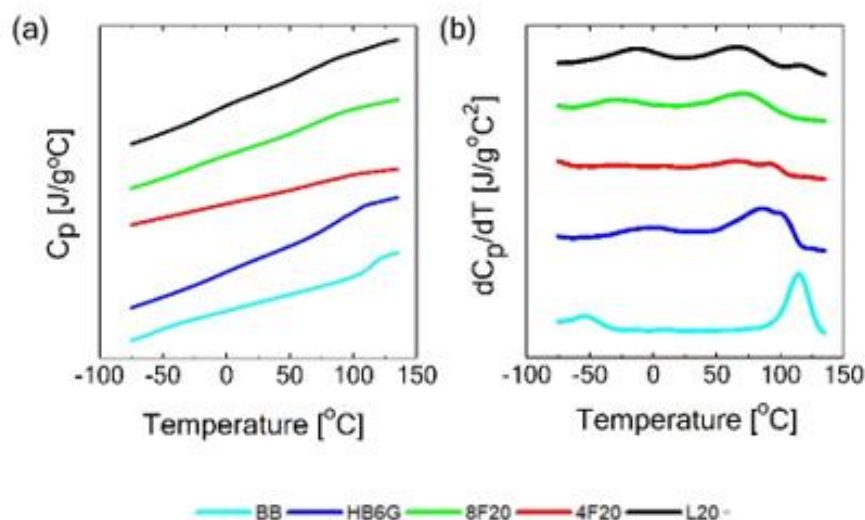

**Figure S2.** The dependence of the reversible heat flow (a) and its derivative with respect to temperature (b) for PEO/PMMA/LiTFSI based polymer electrolytes with regards to various PEO topologies including linear, 4-arms, 8-arms, hyperbranched and bottle brush.

### Electrochemical Impedance Spectroscopy (EIS):

The ionic conductivity ( $\sigma$ ) of the PEO/PMMA blend electrolytes was calculated using the

equation S4<sup>4</sup>:

$$\sigma = \frac{l}{R_b A} \quad (S4)$$

where  $l$  is the polymer electrolyte thickness,  $A$  accounts for the area of the SPE and  $R_b$  is the bulk resistance. The bulk resistance was obtained from the complex impedance plot shown by Figure S3 below.

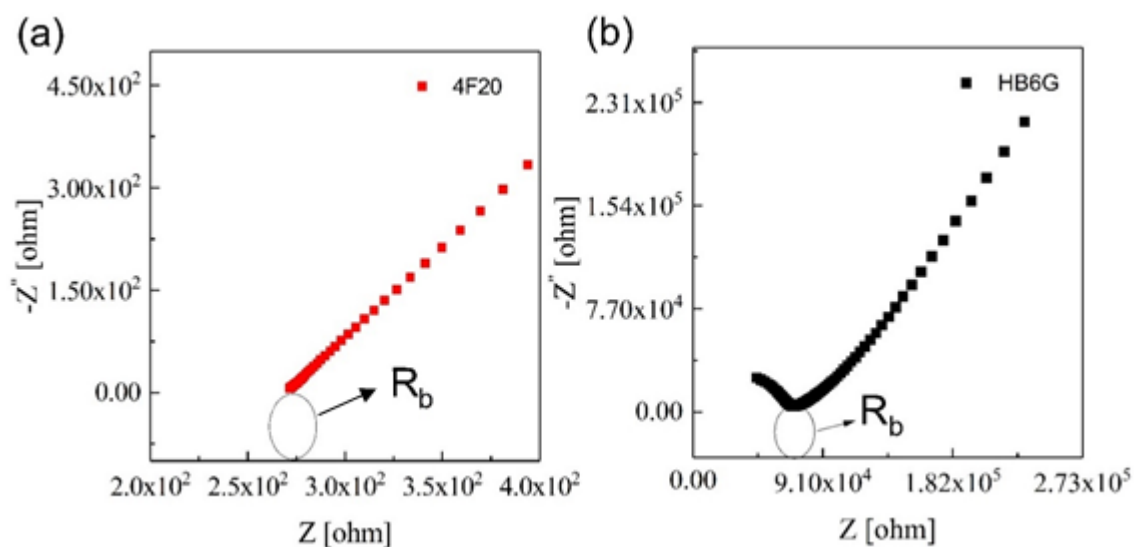

**Figure S3.** Example of Nyquist plots at 60°C used in the ionic conductivity calculations for the PEO blend electrolytes containing %50 4F20 (a) and HB6G PEO (b)

### Broadband Dielectric Spectroscopy (BDS):

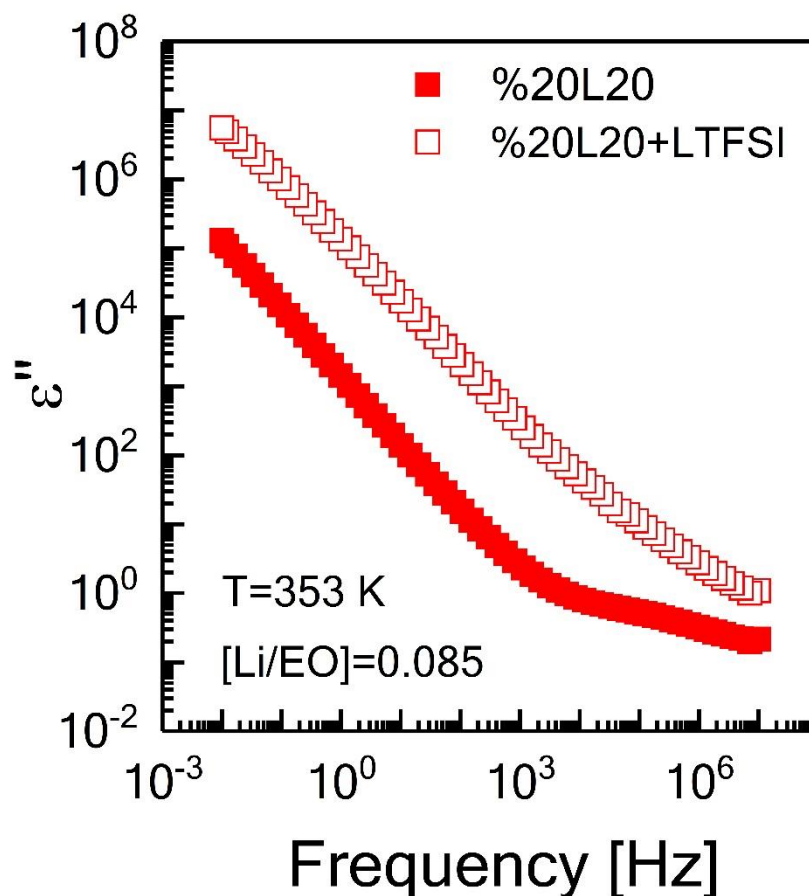

**Figure S4.** The frequency dependence of the dielectric loss ( $\epsilon''$ ) data at 353 K for 20wt% linear PEO/PMMA blend with (open) and without (filled) salt.

### References

1. Yap, Y. L.; You, A. H.; Teo, L. L., Preparation and characterization studies of PMMA–PEO-blend solid polymer electrolytes with SiO<sub>2</sub> filler and plasticizer for lithium ion battery. *Ionics* **2019**, 25 (7), 3087-3098.
2. Lodge, T. P.; McLeish, T. C. B., Self-Concentrations and Effective Glass Transition Temperatures in Polymer Blends. *Macromolecules* **2000**, 33 (14), 5278-5284.
3. He, Y.; Lutz, T. R.; Ediger, M. D., Segmental and terminal dynamics in miscible

polymer mixtures: Tests of the Lodge–McLeish model. *The Journal of Chemical Physics* **2003**, 119 (18), 9956-9965.

4. Vijayakumar, E.; Subramania, A.; Fei, Z.; Dyson, P. J., High-performance dye-sensitized solar cell based on an electrospun poly(vinylidene fluoride-co-hexafluoropropylene)/cobalt sulfide nanocomposite membrane electrolyte. *RSC Advances* **2015**, 5 (64), 52026-52032.
